1 **Comparative RNA-seq based transcriptomic analysis of *Aspergillus***  
2 ***nidulans* recombinant strains overproducing heterologous glycoside**  
3 **hydrolases**

4  
5 Felipe Calzado<sup>1,2\*\*</sup>, Mariane P. Zubieta<sup>1,2\*\*</sup>, Gabriela F. Persinoti<sup>1</sup>, Cesar Rafael Fanchini Terrasan<sup>2</sup>, Marcelo  
6 V. Rubio<sup>1,2</sup>, Fabiano J. Contesini<sup>1</sup>, Fabio M. Squina<sup>3</sup>, André Damasio<sup>2\*</sup>

7  
8  
9  
10 <sup>1</sup>Brazilian Bioethanol Science and Technology Laboratory (CTBE), Brazilian Center for Research in Energy  
11 and Materials (CNPEM), Campinas, SP, Brazil. 13083-970

12  
13 <sup>2</sup>Department of Biochemistry and Tissue Biology, Institute of Biology, University of Campinas  
14 (UNICAMP), Campinas, SP, Brazil. 13083-862

15  
16 <sup>3</sup>Programa de Processos Tecnológicos e Ambientais, Universidade de Sorocaba (UNISO), Sorocaba, SP,  
17 Brazil. 18023-000

18  
19  
20  
21  
22  
23  
24 **Running title:** Transcriptional profile of *A. nidulans* recombinant strains overproducing heterologous  
25 enzymes

26  
27  
28  
29  
30  
31 **\*\* These authors equally contributed to this work**

32  
33  
34 **\*To whom correspondence should be addressed:**

35  
36 André R. L. Damasio; Department of Biochemistry and Tissue Biology, Institute of Biology, University of  
37 Campinas (UNICAMP), Campinas-SP, Brazil Email: [adamasio@unicamp.br](mailto:adamasio@unicamp.br)

38 **ABSTRACT**

39 Filamentous fungi are important cellular factories for the production and secretion of  
40 homologous and heterologous enzymes such as carbohydrate-active enzymes. However, the  
41 regulation of protein secretion in these microorganisms requires more profound studies since the  
42 enzyme levels produced are usually below the levels required by industry for profitable processes.  
43 Genomic and transcriptomic approaches have been used to understand the overexpression and  
44 production of heterologous enzymes and their capacity to induce different cellular biological  
45 processes. To investigate this regulation, *Aspergillus nidulans* recombinant strains were analyzed by  
46 transcriptomics. We designed three *A. nidulans* recombinant strains producing the following  
47 heterologous proteins: alpha-arabinofuranosidase (AbfA), beta-glucosidase (BglC) and thermophilic  
48 mannanase (Tp-Man5). The heterologous genes *abfA* and *bglC* were highly expressed, while *tp-man5*  
49 mRNA levels were low and similar to those of a reference gene. There was an indirect relationship  
50 between mRNA and protein secretion levels, suggesting that transcription is not a bottleneck for target  
51 gene expression in this system. Despite the distinct features of the recombinant proteins, 30  
52 differentially expressed genes were common to all the recombinant strains, suggesting that these  
53 genes represent a general response to the expression of heterologous genes. We also showed that the  
54 early activation of the canonical unfolded protein response (UPR) pathway by *hacA* alternative  
55 splicing was normalized after 8h, except in the strain expressing BglC, suggesting either no  
56 accumulation of the BglC misfolded form or the presence of an alternative endoplasmic reticulum  
57 (ER) stress and UPR pathway. Finally, to focus our analysis on the secretion pathway, a set of 374  
58 genes was further evaluated. Seventeen genes were common to all the recombinant strains, suggesting  
59 again that these genes represent a general response of *A. nidulans* cells to the overexpression of  
60 recombinant genes, even thermophilic genes. Additionally, we reported the possible genetic  
61 interactions of these 17 genes based on coexpression network calculations. Interestingly, protein  
62 improvements are nongeneric, and improvements in the production of one target protein are not  
63 necessarily transferable to another one. Thus, this study may provide genetic and cellular background  
64 and targets for genetic manipulation to improve protein secretion by *A. nidulans*.

65

66

67

68 **Keywords:** *Aspergillus*; RNA-seq; heterologous expression; secretion systems, CAZymes,  
69 glycoside hydrolases

## 70 INTRODUCTION

71 Fungi belonging to the genus *Aspergillus* feature saprophytic lifestyles and have a high  
72 capacity to produce large quantities of extracellular enzymes from complex organic materials (Lowe  
73 and Howlett, 2012). This natural ability for efficient protein secretion has led to their biotechnological  
74 exploitation as cell factories for industrial enzyme production. Notably, a broad range of homologous  
75 and heterologous enzymes such as amylases, xylanases, and cellulases are produced by aspergilli,  
76 thus contributing to the expansion and growth of the enzyme market (Lubertozzi and Keasling, 2009).  
77 If this market continues to increase at an annual rate of 8.2% over a 5-year forecast period, it is  
78 expected to reach approximately \$7.1 billion by 2018 (Research, 2014). *Aspergillus* is among the main  
79 enzyme-producing microorganism, and produces 30% of commercial enzymes, according to a list  
80 from the Association of Manufacturers and Formulators of Enzyme Products (AMFEP, 2015).

81 Despite the abovementioned advantages, there are still many challenges to overcome  
82 regarding the expression of target enzymes using fungal systems. The production of a particular  
83 protein requires high amounts of mRNA, efficient translation of the target gene, targeting of the  
84 protein to the secretion pathway (if secretion is desired), folding, posttranslational modifications, and  
85 low or no degradation of the target protein in the extracellular medium. Several strategies have been  
86 developed to optimize the quantity the quality of enzymes; these strategies include genetic  
87 engineering of promoters for high levels of mRNA (Hirasawa et al., 2018), preferential codon usage  
88 (Cripwell et al., 2017), removal of introns (Chesini et al., 2018), engineering signal peptides for  
89 enhanced protein secretion (Roongsawang et al., 2016), and the deletion of proteases that could  
90 degrade the products (Havlik et al., 2017). The wide variety of tools developed to achieve high yields  
91 of recombinant enzymes highlights how complex this pathway is in filamentous fungi. This  
92 complexity has resulted in a large body of work dedicated to this topic and the rapid development of  
93 new techniques to obtain enzymes. However, in recent decades, there have been no major published  
94 advances that boost the yields of biotech products produced by fungi (Nevalainen and Peterson, 2014;  
95 Meyer et al., 2016).

96 Misfolding and/or errors in the processing of recombinant protein in filamentous fungi is a  
97 critical bottleneck resulting in the elimination of these proteins by endoplasmic reticulum (ER) quality  
98 control (Guillemette et al., 2007; Pakula et al., 2016). Misfolded proteins alter cell homeostasis and  
99 proper ER function, resulting in ER stress. ER stress activates conserved signaling pathways such as  
100 the *unfolded protein response* (UPR) and *ER-associated protein degradation* (ERAD); these  
101 pathways upregulate genes responsible for restoring protein folding homeostasis in cells and  
102 degrading misfolded proteins in the cytosol by the ubiquitin-proteasome system, respectively  
103 (Heimel, 2014).

104 Manipulation of the UPR pathway and its components has been a common strategy to improve  
105 the production of heterologous proteins in filamentous fungi (Hayano et al., 1995; Valkonen et al.,  
106 2004; Xu et al., 2005). Many ER stress-induced UPR genes, including protein folding-related genes  
107 such as chaperones and foldases, have been coexpressed with a heterologous gene. However, the  
108 overexpression of chaperones usually does not increase the production of heterologous proteins. In  
109 *S. cerevisiae*, the overexpression of *bipA* increased the amount of extracellular prochymosin by over  
110 20-fold, although the secretion of thaumatin was not significantly improved (Harmsen et al., 1996).

111 Genomic and transcriptomic approaches have been used to gain a deep understanding of the  
112 overexpression and production of heterologous enzymes and their capacity to induce UPR, providing  
113 valuable information on *Aspergillus* genes involved in the secretion and coordination between UPR  
114 and ERAD. The induction of UPR in *Aspergillus niger* was investigated by transcriptomic analysis  
115 to compare the UPR induced by chemicals and that induced by the overexpression of tissue  
116 plasminogen activator (t-PA) (Carvalho et al., 2012). Approximately 94 genes were commonly  
117 induced, most related to the functional categories of protein folding, translocation/signal peptidase  
118 complex, glycosylation, vesicle trafficking, and lipid metabolism (Carvalho et al., 2012). In addition,  
119 another study showed that UPR results in the activation of approximately 400 genes in *S. cerevisiae*  
120 (7-8% of the genome) (Travers et al., 2000). This reflects the complex network of interactions  
121 between UPR and other signaling pathways in the cell. Transcriptome profiles can be particularly  
122 important for providing an overview of all genes and pathways regulated by the UPR in a cell.

123 Interestingly, protein improvements are highly variable, and improvements in one protein are  
124 not necessarily transferable to others. In addition, decades of rational and nonrational strains  
125 improvements have not been available to academia due to commercial confidentiality (Meyer et al.,  
126 2016). Here, we performed a comparative transcriptome analysis of three *A. nidulans* recombinant  
127 strains producing the following heterologous proteins: 1) GH51 alpha-arabinofuranosidase (AbfA)  
128 (*A. nidulans*<sub>AbfA</sub>); 2) GH3 beta-glucosidase (BglC) (*A. nidulans*<sub>BglC</sub>) and 3) GH5 thermophilic  
129 mannanase (Tp-Man5) (*A. nidulans*<sub>Tp-Man5</sub>). These enzymes have very different domains and  
130 posttranslational modifications, so our interest was to identify common differentially expressed (DE)  
131 genes that potentially represent a general cellular adaptation to the overexpression of heterologous  
132 genes, including a hyperthermophilic gene. The transcriptional profiles of *A. nidulans* recombinant  
133 strains were determined at early and late periods of induction. Despite the distinctive features of the  
134 recombinant proteins, 30 DE genes were common to all the recombinant strains. It is likely that these  
135 genes represent a general response to the expression of heterologous genes. Furthermore, 17 genes  
136 specifically related to the secretion pathway were DE in the recombinant strains suggesting again that  
137 these genes represent a general response of *A. nidulans* cells to the overexpression of recombinant

138 genes, even a thermophilic gene. Our results provide new potential targets for genetic manipulation  
139 and the improvement of protein secretion yields in this microbial system.

140

## 141 **RESULTS AND DISCUSSION**

### 142 **Recombinant proteins are secreted at different levels**

143 To study the production of heterologous proteins in *A. nidulans*, three recombinant proteins  
144 were monitored: AbfA and BglC were cloned from *Aspergillus fumigatus*, and thermophilic Tp-Man5  
145 was cloned from the hyperthermophilic bacterium *Thermotoga petrophila*. These target sequences  
146 were cloned into the pEXPYR vector and transformed into *A. nidulans*<sub>SA773</sub> (Segato et al., 2012).  
147 Interestingly, the recombinant proteins were secreted at different levels, *i.e.*, AbfA > BglC > Tp-Man5.  
148 The transformed strains were denominated *A. nidulans*<sub>AbfA</sub>, *A. nidulans*<sub>BglC</sub> and *A. nidulans*<sub>Tp-Man5</sub>.

149 Initially, the time course of recombinant enzymes production was evaluated (**Figure 1**).  
150 Despite differences in the secretion of recombinant proteins, the profiles of mycelium dry weight,  
151 amount of extracellular proteins and final pH were very similar in the recombinant strains. The  
152 similarities among these parameters indicate that the overexpression of heterologous genes may not  
153 imply major physiological changes in the recombinant strains. AbfA showed the highest level of  
154 secretion, with an activity peak at 48 h (9.53 U/ml) (**Figure 1A; middle panel**). BglC secretion was  
155 lower than AbfA and the activity peak was early at 24 h (**Figure 1B; middle panel**; 8.73 U/ml).  
156 Overall, after 48 h of cultivation, a protease degradation profile was observed for each of the  
157 recombinant strains (**Figure 1; bottom panel**). At this cultivation time point, cells probably undergo  
158 disruption due to the absence of nutrients. Higher beta-glucosidase activity was detected from 72 to  
159 120 h (**Figure 1B; middle panel**), corresponding to a native intracellular beta-glucosidase (AN2828)  
160 whose amino acid sequence/identity was further confirmed by LC-MS/MS (data not shown). In  
161 contrast, the enzyme Tp-Man5 was not observed in the gel; however, some residual activity (0.6  
162 U/ml) was linearly detected from 18 to 120 h, suggesting that this thermophilic enzyme is resistant  
163 to protease degradation (**Figure 1C; middle panel**). Notably, the enzymatic activity of this GH5  
164 mannanase was measured at a high temperature (87 °C), avoiding the possibility of false-positive  
165 results. Protein secretion driven by strong promoters (such as *glaAp*) is often affected by extracellular  
166 proteolysis. This is a very common phenomenon, occurring in filamentous fungi that secrete native  
167 proteases, or in response to glucose starvation or increased pH (Budak et al., 2014; Segato et al.,  
168 2012; Yoon et al., 2011).

169 To investigate whether the low secretion of the BglC and Tp-Man5 bands was caused by  
170 folding and/or secretion impairment, protein profiles and enzymatic activity assays were analyzed in  
171 the intracellular fraction (**Figure S1**). The overexpression of recombinant proteins may cause their  
172 intracellular accumulation, suggesting breakdown or overloading of the secretory pathway (Sims et

173 al., 2005). However, BglC and Tp-Man5 were not detected in the intracellular fraction, indicating  
174 that these proteins did not accumulate inside the cell.

175 In this first analysis, we observed that recombinant protein secretion levels were higher for  
176 AbfA and BglC than for Tp-Man5, which showed residual activity in *A. nidulans*.

177

### 178 **Heterologous genes were highly expressed in *A. nidulans***

179 To investigate whether the differences in recombinant enzymes production were linked to  
180 mRNA abundance, the expression of *abfA*, *bglC* and *tp-man5* was measured by qPCR. The *abfA* and  
181 *bglC* genes were more highly expressed than the endogenous reference gene (*tubC*), while the levels  
182 of *tp-man5* were similar to those of *tubC* (**Figure 2A**).

183 The production of recombinant proteins in filamentous fungi controlled by strong promoters  
184 activates some regulatory genes of protein quality control and UPR (Liu et al., 2014; Nevalainen and  
185 Peterson, 2014; Pakula et al., 2003). The UPR represents an adaptive response to restore cellular  
186 homeostasis, triggered by ER stress (Guillemette et al., 2011). The basic sensing pathway to detect  
187 ER stress or an increase in the folding load is highly conserved from yeast to humans. The  
188 accumulation of misfolded proteins stimulates Ire1 autophosphorylation and dimerization, triggering  
189 the unconventional splicing of an intron in the *hacA<sup>u</sup>* to create the transcriptionally active form *hacA<sup>i</sup>*  
190 (Guillemette et al., 2011). HacA is a conserved bZIP transcription factor in eukaryotic cells,  
191 regulating gene expression in response to various forms of secretion stress and as part of secretory  
192 cell differentiation (Carvalho et al., 2012).

193 UPR target genes such as *bipA*, *cpcA* and *sell/ubx2* were quantified as a function of time  
194 (**Figure 2B**) (Cerqueira et al., 2014; Heimel, 2014; Sims et al., 2005; Wood et al., 2012). The putative  
195 ubiquitin-protein ligase-encoding gene *sell/ubx2* was slightly overexpressed in the recombinants  
196 strains at 2 h and showed a tendency to normalize after 8 h. Likewise, *bipA* was overexpressed in the  
197 BglC-producing strain at 2 h and returned to basal levels at 8 h. *cpcA* was not overexpressed in any  
198 of the recombinant strains.

199 In *Trichoderma reesei*, the production of recombinant proteins moderately induced the  
200 overexpression of UPR genes only at early cultivation stages (from 1 to 12 h), and after 12 h, the  
201 expression of these genes returned to basal levels (Wang et al., 2014). Heterologous expression of the  
202 bacterial xylanase B (*xynB*) in *A. niger* also resulted in lower mRNA levels of some UPR target genes  
203 (*gla*, *bip1*, and *hac1*) (Zhang et al., 2008).

204 An indirect relationship between mRNA levels and the production of recombinant proteins  
205 was also reported for cellobiohydrolases (CBHs) from *Aspergillus terreus* and *T. reesei* expressed in  
206 *Aspergillus carbonarius* (Zoglowek et al., 2015). These authors speculated that proteolytic  
207 degradation could be one reason, possibly along with other factors such as incorrect folding,

208 posttranslational processing, and impairment of intracellular transport (Zoglowek et al., 2015). This  
209 indirect relationship is frequently reported, suggesting that transcription is not a bottleneck in these  
210 systems.

211 In an attempt to identify the cellular processes altered during the adaptation of *A. nidulans* to  
212 the overexpression of recombinant genes, we analyzed the three recombinant strains by RNA-seq.  
213 We defined 2 and 8 h as standard time points for RNA-seq, based on the time course of recombinant  
214 protein production, the maltose consumption profile (**Figure S2**) and qPCR data.

## 215 216 **Global transcriptional response to heterologous protein production**

217  
218 Differential expression was determined by pairwise comparisons of the recombinant strains  
219 and the control strain *A. nidulans*<sub>A773</sub>. Four hundred seventy-six DE genes were identified by applying  
220 the pipeline and thresholds described in the Methods section (**Figure 3**). Thirty out of 476 DE genes  
221 were common to the three recombinant strains. *A. nidulans*<sub>AbfA</sub> and *A. nidulans*<sub>Tp-Man5</sub> also had 74 DE  
222 genes in common (**Figure 3 and Figure S3**).

223 To explore the cellular processes enriched by the production of recombinant proteins in *A.*  
224 *nidulans*, the annotation of DE genes was performed by The Functional Catalogue (FunCat) (Ruepp,  
225 2004). The most significant functional category was “metabolism”, followed by “protein with binding  
226 function or cofactor”, “cellular transport” and “cell defense” (**Figure 4**). These four categories were  
227 enriched in all the recombinant strains and were also reported in other *Aspergillus* species  
228 overproducing recombinant proteins (Kwon et al., 2012; Liu et al., 2014; Zhou et al., 2016). The  
229 overexpression of glucoamylase (GlaA) in *A. niger* resulted in the enrichment of “translocation”,  
230 “protein glycosylation”, “vesicle transport” and “ion homeostasis” processes (Kwon et al., 2012). The  
231 functional categories “cellular transport”, “amino acid metabolism”, “aminoacyl-tRNA biosynthesis”  
232 and “metabolism” were overrepresented in an *Aspergillus oryzae* recombinant strain expressing a  
233 constitutively active form of *hacA*, indicating its importance for UPR, fungal growth, and physiology  
234 (Zhou et al., 2016).

235 Moreover, three patterns of expression were observed for the 30 DE genes in the three  
236 recombinant strains: genes upregulated at 2 and 8 h, genes downregulated at 2 h and upregulated at 8  
237 h, and genes upregulated at 2 h and downregulated at 8 h (**Figure 5, Table S1 and S2**). These genes  
238 represent biological processes such as sexual sporulation, defense, detoxification and secondary  
239 metabolism, which are likely to constitute a common response of *A. nidulans* cells under recombinant  
240 protein production independent of the protein’s features, such as size, the complexity of folding and  
241 posttranslational modification pattern.

242 To evaluate the canonical pathway of UPR, we analyzed the ratio of *hacA* splicing in *A.*  
243 *nidulans* recombinant strains based on the RNA-seq data (**Figure S4**). The levels of *hacA* splicing  
244 were higher for AbfA and Tp-Man5 than for BglC at 2 h, suggesting the presence of misfolded  
245 proteins. After 8 h, the levels of *hacA* splicing for all the recombinant strains were lower than those  
246 for the control strain, showing normalization of the UPR canonical pathway. This result suggests  
247 either no accumulation of the BglC misfolded form or the presence of an alternative ER stress and  
248 UPR pathway. The RNA-seq and qPCR data showed an acceptable correlation (Figure S5). Wang et  
249 al (2014) analyzed *hac1* levels in the *T. reesei* Rut C30 and QM9414 strains. The transcript levels of  
250 *hac1* increased earlier in Rut C30 (1 h of induction), corroborating our data (Wang et al., 2014).

251 Based on the RNA-seq data for the recombinant strains, we observed a globally upregulated  
252 transcriptional response. Moreover, biological processes related to metabolism, protein with binding  
253 function and cellular transport were enriched. Unconventional splicing of *hacA* was observed in *A.*  
254 *nidulans*<sub>AbfA</sub> and *A. nidulans*<sub>Tp-Man5</sub>, indicating some level of ER stress. The global analysis showed  
255 mild stress at 2 h after the induction of heterologous protein production, which was normalized after  
256 8 h.

257

### 258 **Differential expression of genes related to the secretion pathway**

259 The production of heterologous proteins is not only impaired by the low expression of  
260 heterologous genes but can also be reduced by problems with secretory pathway posttranslational  
261 processing (Yoon et al., 2010). Many studies have attempted to understand the high capacity of  
262 *Aspergillus* for protein production, primarily at the transcriptional level (Carvalho et al., 2012;  
263 Guillemette et al., 2007; Kwon et al., 2012; Liu et al., 2014; Sims et al., 2005). These studies identified  
264 important genes in different stages of the protein production pathway, such as translocation, folding,  
265 cargo transport and exocytosis (Schalén et al., 2016). Liu et al. (2014) listed a set of genes involved  
266 in the secretion pathway of *A. oryzae* using the secretory model *S. cerevisiae* as a scaffold. Based on  
267 this list, we defined the homologous or best-hit genes in *A. nidulans* by using the AspGD data,  
268 grouping a set of 374 genes (**Table S3**).

269 Seventeen genes were DE in the recombinant strains (**Table S4; Figures 6A and B**). The most  
270 highly represented categories were “stress response”, “protein folding and stabilization” and  
271 “unfolded protein response”, with 10, 8 and 8 genes, respectively (**Figure 6C**). To gain insights into  
272 genetic interactions, ten different RNA-seq networks were calculated to show DE genes, and each of  
273 the 17 genes involved in protein secretion was present in no more than one network (**Figure S6**). The  
274 number of nodes and edges of the networks varied from 40 and 507 to 1155 and 276232, respectively.  
275 Biological process enrichment was carried out for entire networks as well as specific genes of interest  
276 and their close neighbors.



277           Among the 17 genes mentioned previously, AN1296, AN3787, AN1620, AN2045, AN8153,  
278 AN6010 and AN6145 were found in different networks. Regarding biological process enrichment for  
279 all networks, a  $p\text{-value} \leq 10^{-3}$  was considered significant. In the networks containing AN1296 and  
280 AN6010, no statistically significant enriched biological processes were found, but for the other five  
281 genes, different processes were enriched, including amino acid, carboxylic acid, aldehyde and  
282 aromatic amino acid catabolic processes; chromosome organization; cellular response to DNA  
283 damage stimulus; cellular response to stress; filamentous growth; hyphal growth; cell development;  
284 biosynthetic process; metabolic process; precursor metabolite energy; and proton transport.

285           Although these seven aforementioned networks contained only one gene of interest, three  
286 networks included more than one gene. AN2731 and AN6089 were found in the same network and  
287 were upregulated in *A. nidulans*<sub>BglC</sub>. Both genes are predicted to encode different heat shock proteins.  
288 The genes AN1933, AN5105, AN7534 and AN9397 were also found in the same network.  
289 Interestingly these four genes were downregulated in *A. nidulans*<sub>Tp-Man5</sub> and *A. nidulans*<sub>AbfA</sub> (**2h**).  
290 However, no biological processes were found to be enriched. In addition, the deletion of orthologs of  
291 AN1933, AN5105 and AN9397 was not lethal in *S. cerevisiae*, although growth defects or decreased  
292 levels of protein were observed in specific situations (Han et al., 2010; Kriangkripipat and Momany,  
293 2009; Valkonen et al., 2003).

294           Finally, AN9124, AN4583, AN5129 and AN8269 were DE and grouped within the same  
295 network (**Figure 7**). AN4583 encodes a putative peptidyl-prolyl cis-trans isomerase D, and the  
296 transcriptional level of its ortholog (CPR7) in *S. cerevisiae* was increased during UPR. This enzyme  
297 mediates signaling or conformational changes in the chaperone Hsp90, and its deletion resulted in  
298 growth defects (Zuehlke and Johnson, 2012). The other genes (AN9124, AN5129 and AN8269)  
299 encode heat shock proteins involved in protein folding during stress. The deletion of their orthologs  
300 in *S. cerevisiae* was not lethal (Chang et al., 1997; Floer et al., 2008; Matsumoto et al., 2005).  
301 Interestingly, this was the only network in which “protein folding” was observed as an enriched  
302 biological process, for the whole network as well as for the specific genes and their close neighbors.  
303 Thus, these four genes are potential targets for genetic manipulation to improve heterologous protein  
304 production in *A. nidulans*.

305           The information generated from the transcriptomic analysis is highly important for selecting  
306 the best targets for genetic engineering of the secretory pathway of *Aspergillus* strains. The deletion  
307 or overexpression of such genes can interfere with enzyme production. For instance, overexpression  
308 of the Rab GTPase *rabD* in *A. nidulans*, which is involved in vesicle-mediated exocytic secretion and  
309 autophagy, improved the production of a recombinant glucoamylase by 40%. On the other hand, the  
310 overexpression of other genes, such as AN6307 and AN4759, which are involved in the transport of

311 proteins from the ER to the Golgi and from the Golgi to the plasmatic membrane, considerably  
312 reduced recombinant enzyme secretion (Schalén et al., 2016).

313 The deletion of AN6305 (PkaA), which encodes cAMP-dependent protein kinase A, enhanced  
314 the secretion of hydrolytic enzymes in *A. nidulans*. The knockout strain showed increased hyphal  
315 branching, higher expression of SynA, involvement in secretion, and increased expression of genes  
316 associated with mitochondrial function, fatty acid metabolism, and the use of cell storage (de Assis et  
317 al., 2015). In a different work, the deletion of an  $\alpha$ -amylase, which is the most highly secreted protein  
318 in *A. oryzae*, alleviated UPR induction and resulted in the overexpression of a mutant 1,2- $\alpha$ -D-  
319 mannosidase (Yokota et al., 2017). In addition, the double deletion of CreA and CreB, which are  
320 involved in the regulatory machinery of carbon catabolite repression, in *A. oryzae* resulted in more  
321 than 100-fold higher xylanase and  $\beta$ -glucosidase activities than those in the wild-type strain (Ichinose  
322 et al 2017).

323

## 324 CONCLUSIONS

325 The production of recombinant proteins in filamentous fungi remains a "black box" because  
326 biotechnology companies have carried out part of the scientific development in this field. All insights  
327 at the genomic, transcriptomic and proteomic level are welcome and may reveal a pipeline for genetic  
328 manipulation to generate "superior" strains for enzyme production.

329 In our manuscript, the first important result was the analysis of a thermophilic gene in *A.*  
330 *nidulans*. Even a gene from a phylogenetically distant bacterium was properly expressed in *A.*  
331 *nidulans*, despite low levels of protein production. Moreover, for BglC and Tp-Man5, the low levels  
332 of production are probably related to translation instead of secretion since these proteins were not  
333 found to be trapped inside the cell. Therefore, the first part our results showed the indirect relationship  
334 between mRNA expression and protein production, highlighting a thermophilic gene. Another  
335 interesting result was that, despite the distinct features of the recombinant proteins, 30 DE genes were  
336 common to all the recombinant strains. A likely conclusion is that these genes represent a general  
337 response to the expression of heterologous genes. Even though we did not design knockout mutants  
338 to address the functions of these 30 genes in protein production/secretion, the identification of these  
339 genes themselves offers new targets for genetic manipulation and strain improvement.

340 We also showed early activation of the canonical UPR pathway by *hacA* alternative splicing  
341 that was normalized after 8 h, although not in the strain expressing BglC, suggesting either that there  
342 was no accumulation of the BglC misfolded form or the presence of an alternative ER stress and UPR  
343 pathway. Finally, in order to focus our analysis on the secretion pathway, a set of 374 genes was  
344 further evaluated. Seventeen genes were common to all the recombinant strains, suggesting again that  
345 these genes represent a general response of *A. nidulans* cells to the overexpression of recombinant

346 genes, even a thermophilic gene. Additionally, we reported the possible genetic interactions of these  
347 17 genes based on coexpression network calculations.

348 Our data highlight the complexity of producing heterologous enzymes in *A. nidulans*. The  
349 response to heterologous protein production is nongeneric, and improvements in the production of  
350 one target protein are not necessarily transferable to other strains. Thus, this study may provide a  
351 genetic and cellular background and targets for genetic manipulation to improve protein secretion by  
352 *A. nidulans*.

353

## 354 **MATERIALS AND METHODS**

### 355 **Strain maintenance and cultivation conditions**

356 *A. nidulans*<sub>Δ773</sub> (pyrG89;wA3;pyroA4) was purchased from the Fungal Genetics Stock Center  
357 (FGSC, St Louis, MO). The strains *A. nidulans*<sub>ΔbfA</sub>, *A. nidulans*<sub>BglC</sub> and *A. nidulans*<sub>TP-Man5</sub> were  
358 previously transformed and tested by our research group, as described by Segato 2012 (Segato et al.,  
359 2012). We purchased 5-fluorotic acid (5-FOA) from Oakwood Products Inc (NC9639762), and all  
360 other chemicals were from Sigma–Aldrich, Megazyme and Fisher Scientific.

361 Vegetative cultures and conidia production cultures were prepared by cultivation in minimal  
362 medium as described by Clutterbuck (Clutterbuck, 1992) and Pontecorvo (Pontecorvo et al., 1953).  
363 *A. nidulans* strains were cultivated in minimal medium containing 5% 20× Clutterbuck salts, 0.1%  
364 1000× vitamins, 0.1% 1000× trace elements, pH 6.5 and supplemented with pyridoxine (1 mg/L),  
365 uracil/uridine (2.5 mg/L each) whenever required. Minimal medium was supplemented with 1%  
366 glucose for mycelium growth (growth medium) or 2% maltose and 250 mM HEPES buffer (Sigma–  
367 Aldrich) for promoter activation and protein production (induction medium). Incubation was carried  
368 out at 37 °C.

369

### 370 **Production and secretion of client proteins**

371 Pre-cultures were prepared by inoculating fresh 10<sup>8</sup> spores/ml in 30 mL of minimal medium  
372 supplemented with 1% (w/v) glucose for the mycelium growth for 48 h at 150 rpm and 37 °C. Strains  
373 cultivation were performed in biological triplicates. The mycelium was washed with autoclaved  
374 distilled water, filtered with Miracloth, and then transferred to the induction medium. After defined  
375 periods for protein induction, the mycelium was collected, Miracloth filtered, dried, frozen in liquid  
376 nitrogen and stored at -80 °C. The medium was collected, centrifuged at 10,000 × g for 10 min prior  
377 to concentration by ultrafiltration (10 kDa cutoff Amicon), quantified by the Bradford  
378 method (Bradford, 1976), purity was assessed by SDS-PAGE (Shapiro and Maizel, 1969) and then  
379 used for biochemical studies.

380

## 381 **Analytical assays**

382 The enzymatic activity of beta-glucosidase GH3 (BglC) was determined with 4-nitrophenyl-  
383  $\beta$ -D-glucopyranoside (Sigma–Aldrich) and that of alpha-arabinofuranosidase GH51 (AbfA) with 4-  
384 nitrophenyl- $\alpha$ -L-arabinofuranoside (Sigma–Aldrich). The enzymatic activity assays were performed  
385 by adding 40  $\mu$ L of extracellular crude extract to 50  $\mu$ L of each substrate at 5 mM in 10  $\mu$ L of 100  
386 mM ammonium acetate buffer (pH 5.5) followed by incubation for 45 min at 50 °C. The enzymatic  
387 reactions were stopped with sodium carbonate. The absorbance was read at 405 nm with a Multimode  
388 Infinite M200 Reader (Tecan, SC), and activity was calculated using p-nitrophenol as the standard.

389 The enzymatic activity of thermophilic mannanase GH5 (Tp-Man5) was determined with  
390 locust bean gum (Sigma–Aldrich) as the substrate. The reaction was performed by adding 1  $\mu$ g of  
391 proteins from concentrated extracellular crude extract to 50  $\mu$ L of 1% (w/v) substrate in 50 mM  
392 ammonium acetate buffer (pH 5.5) and incubating for 10 h at 87 °C. The release of reducing sugars  
393 was measured with DNS acid (Miller, 1959), and absorbance was read at 540 nm with a Multimode  
394 Infinite M200 Reader (Tecan, SC) and compared to a glucose standard curve. Statistical calculations  
395 and plotting were carried out with GraphPad Prism v 5.0 Software (California, US).

396 The concentration of maltose was detected by high-performance liquid chromatography  
397 (HPLC) Agilent Infinity 1260 with IR detector 50C, Aminex column HPX-87P 300 mm x 7.8 mm at  
398 50 °C and 0.5 mL/min of ultrapure Milli-Q water as eluent phase.

399

## 400 **Intracellular protein analysis**

401 Intracellular proteins were extracted from frozen mycelium after grounding in liquid nitrogen  
402 to a fine powder using a mortar and a pestle. The powder was gently suspended in 5 mL of extraction  
403 buffer (20 mM Tris-HCl pH 8.0; 0.05 % (w/v) Triton™ X-100 (Sigma-Aldrich), and 150 mM NaCl,  
404 containing protease inhibitors (2 mM PMSF and Protease Inhibitor Cocktail N221-1mL from  
405 Amresco), and centrifuged twice at 8000 rpm for 15 min at 4 °C; then, the supernatant was collected  
406 for SDS-PAGE analysis (Shapiro and Maizel, 1969).

407

## 408 **RNA extraction**

409 Total RNA was extracted from frozen mycelium using the Quick-RNA™ MiniPrep kit (Zymo  
410 Research) according to the manufacturer's instructions. The integrity of extracted RNA was evaluated  
411 (RIN  $\geq$  8) on the Agilent Bioanalyzer 2100 and quantified using an ND-1000 NanoDrop (Thermo  
412 Scientific) spectrophotometer. Total purified RNA was stored at -80 °C until further processing.

413

414

415

## 416 **RNA-seq data analysis**

417 For RNA-seq sample preparation, total RNA was obtained from the four *A. nidulans* strains  
418 (three recombinant strains and the parental strain) cultivated for 2 and 8 h in biological triplicate,  
419 resulting in twenty-four samples for library preparation using the TruSeq Stranded mRNA Library  
420 Prep Kit v2 (Illumina) according to the manufacturer's instructions. Sequencing libraries were  
421 prepared and sequenced using Illumina HiSeq 2500 at the CTBE NGS sequencing facility.  
422 Approximately 148 million 100-bp paired-end reads were obtained for the *A. nidulans*<sub>A773</sub>, *A.*  
423 *nidulans*<sub>AbfA</sub>, and *A. nidulans*<sub>BglC</sub> strains and 130 million reads were obtained for the *A. nidulans*<sub>TP-</sub>  
424 <sub>Man5</sub> strain, representing a total of 115 GB. Reads were quality-checked and filtered using FASTQC  
425 and Trimmomatic (Bolger et al., 2014), respectively, and rRNA contamination was assessed and  
426 removed using sortmeRNA (Kopylova et al., 2012). The rate of rRNA contamination was lower than  
427 16% in all samples, except in one 8 h AbfA replicate (**Table S5**). QC reads were aligned to the  
428 *Aspergillus nidulans* genome available at AspGD (<http://www.aspgd.org/>) using TopHat2 (Kim et  
429 al., 2013), and the concordant pair alignment rate varied between 84 and 93%. An acceptable replicate  
430 agreement was obtained for all conditions, as shown by PCA analysis and clustering of the samples  
431 data.

432 For differential expression analysis, pairwise comparisons between each strain and the control  
433 strain *A. nidulans*<sub>A773</sub> were performed using the DESeq2 R/Bioconductor package (Love et al., 2014),  
434 applying a log<sub>2</sub> fold change  $\geq 2$  or  $\leq -2$  and an adjusted p-value  $\leq 0.01$  as thresholds. For secretion  
435 pathway analysis, a log<sub>2</sub> fold change  $\geq 1$  or  $\leq -1$  and an adjusted p-value  $\leq 0.01$  were used as  
436 thresholds. Graphs were constructed using GraphPad Prism v 5.0 Software and an online tool for  
437 Venn diagrams, Venny 2.1 (<http://bioinfogp.cnb.csic.es/tools/venny/>).

438

## 439 **Functional annotation**

440 For functional annotation of DE genes identified by RNA-seq analysis, lists of genes were  
441 generated by filtering the results with log<sub>2</sub> FC  $\leq -1.0$  or  $\geq 1.0$  and adjusted p-value  $\leq 0.01$ . The gene  
442 expression values of the recombinant strains were compared to the control strain *A. nidulans*<sub>A773</sub>. The  
443 gene lists obtained were then used for functional annotation using FunCat (Functional Catalogue)  
444 (Ruepp, 2004).

445 The selected genes for annotation with FunCat were faced with the database of the reference  
446 genome of *A. nidulans* and applied statistical Fisher test with p-value  $\leq 0.05$  as a threshold. The  
447 enriched functional categories and subcategories were used for comparisons and graphics generation.  
448 Data analysis was performed using GraphPad Prism v 5.0 Software (California, US).

449

450

## 451 **Secretion pathway analysis**

452 A list of 374 secretory pathway genes was generated based on Liu et al. (2014), who defined  
453 a list with the functional protein secretory components from *A. oryzae* using the secretory model *S.*  
454 *cerevisiae* as a scaffold (Liu et al., 2014). This list was further adapted to filamentous fungi by adding  
455 *A. oryzae* orthologs of the secretory components reported for other *Aspergillus* species, such as *A.*  
456 *nidulans* and *A. niger*. The homologous genes in *A. nidulans* reported in AspGD resources were then  
457 used to generate the list with 374 genes.

458 DE genes of the secretory pathway were functionally annotated with FunCat, and the most  
459 representative functional categories were used to build a secretory pathway profile of the three  
460 recombinant strains. To generate this profile, the FC values of the DE genes involved with secretion  
461 pathway were used to create heat maps using R.

462

## 463 **Quantitative real-time PCR (qRT-PCR) analysis**

464 To quantify the expression of selected genes, qRT-PCR was performed. For this analysis, 2  
465  $\mu\text{g}$  of pure RNA was used for cDNA synthesis using the First Strand cDNA Maxima™ Synthesis Kit  
466 (Thermo Scientific), according to the manufacturer's instructions. The cDNA was diluted 1/50 and  
467 used for analysis in the ViiA™ 7 Real-Time PCR System, using Maxima SYBR™ Green (Thermo  
468 Scientific) for signal detection, in accordance with the manufacturer's instructions. The gene  
469 encoding  $\beta$ -tubulin (AN6838) was used as an endogenous control because it is a stable gene in  
470 filamentous fungi (Llanos et al., 2015).

471 The PCR conditions were as follows: 95 °C for 30 s, followed by 40 cycles at 95 °C for 10 s  
472 and 60 °C for 60 s. The melting curve was analyzed with ViiA™ 7 Software (Thermo Scientific) to  
473 confirm the presence of only one amplicon, according to the  $T_m$  expected for each gene. Gene  
474 expression values were calculated according to the  $2^{-\Delta\Delta CT}$  method (Livak and Schmittgen, 2001).  
475 Primers used in the qPCR experiments are described in **Table S6**. Data analysis was performed using  
476 GraphPad Prism v 5.0 Software (California, US).

477

## 478 **Weighted gene co-expression network analysis**

479 We applied the WGCNA in order to identify groups (modules) of genes that showed highly  
480 co-expressed gene expression across the two treatments (2h and 8h ) under a specific condition (Tp-  
481 Man5, BgCl and AbfA). The co-expression analysis was implemented with the WGCNA package in  
482 R (Langfelder and Horvath, 2008). Consensus WGCNA analysis consisted of construction of  
483 correlation matrices, which were then converted into adjacency matrices that retain information about  
484 the sign of the correlation (i.e., signed networks use a transformation of  $0.5 \times (r + 1)$ ). The soft power  
485 threshold chosen was based on a measure of  $R^2$  scale-free topology model fit that maximized and

486 plateaued well above 0.7 (i.e., soft power = 20 for both datasets). Modules were merged at a cut height  
487 of 0.2, and the minimum module size was set to 30. As a result, for both treatments, we got sets of  
488 genes (modules) that were highly co-expressed within the modules, but not necessarily between the  
489 modules. We identified 29 distinct co-expression modules that contain at least one secretion gene or  
490 a transcription factor.

491

#### 492 **Functional enrichment analysis**

493 To assess functional enrichment, Gene Ontology (GO) Biological Processes term and Kyoto  
494 Encyclopedia of Genes and Genomes (KEGG) pathway analyses of WGCNA network modules were  
495 performed using Cytoscape plug-in BinGO (Maere et al., 2005). These analyses provided a  
496 comprehensive set of functional annotation tools for investigators to understand the biological  
497 meaning behind large lists of genes.

498

#### 499 **Data availability**

500 The datasets generated and/or analyzed during the current study are available in the Gene  
501 Expression Omnibus (GEO) repository, GSE101522,  
502 <https://www.ncbi.nlm.nih.gov/geo/query/acc.cgi?acc=GSE101522>.

503 **ACKNOWLEDGMENTS**

504 This research was supported in part by FAPESP (grant 2012/20549-4 to ARLD; 2014/06923-6 to  
505 FMS). We are grateful to the National Council for Scientific and Technological Development (CNPq)  
506 for the financial support (441912/2014-1 and 304816/2017-5 to ARLD). CRFT, MVR, MPZ and FC  
507 received FAPESP fellowships (2017/10083-1; 2013/24988-5; 2014/15403-6; 2014/23051-2). We  
508 thank the LNBio Mass Spectrometry staff for the assistance with LC-MS/MS and the CTBE High  
509 Throughput Sequencing and Robotics Laboratory (NGS) for the assistance with RNAseq.

510

511

512 **COMPETING INTERESTS**

513 The authors declare that they have no competing interests.

514

515 **AUTHOR'S CONTRIBUTIONS**

516 ARLD conceived and designed the experiments. FC, MVR, MPZ participated in the design of the  
517 study and performed the RNAseq experiments. GFP filtered the RNAseq raw data and generated the  
518 differential expressed genes lists. FC, MVR, MPZ, FJC, GFP and ARLD analyzed the RNAseq data.  
519 FC, FMS, FJC and CRFT helped to interpret the experimental data. FC and ARLD drafted the  
520 manuscript. ARLD, CRFT, FMS and GFP revised the manuscript. All authors read and approved the  
521 final manuscript.

522



523 **REFERENCES**

- 524 AMFEP (2015). List of commercially available enzymes. *Assoc. Manuf. Formul. Enzym. Prod.* Amfep/15/0,  
525 <http://www.amfep.org/content/list-enzymes>.
- 526 Bolger, A. M., Lohse, M., and Usadel, B. (2014). Trimmomatic: A flexible trimmer for Illumina sequence  
527 data. *Bioinformatics* 30, 2114–2120. doi:10.1093/bioinformatics/btu170.
- 528 Bradford, M. M. (1976). A rapid and sensitive method for the quantitation of microgram quantities of protein  
529 utilizing the principle of protein-dye binding. *Anal. Biochem.* 72, 248–254. doi:10.1016/0003-  
530 2697(76)90527-3.
- 531 Budak, S. O., Zhou, M., Brouwer, C., Wiebenga, A., Benoit, I., Di Falco, M., et al. (2014). A genomic survey  
532 of proteases in *Aspergilli*. *BMC Genomics* 15, 523. doi:10.1186/1471-2164-15-523.
- 533 Carvalho, N. D., Jørgensen, T. R., Arentshorst, M., Nitsche, B. M., van den Hondel, C. A., Archer, D. B., et  
534 al. (2012). Genome-wide expression analysis upon constitutive activation of the HacA bZIP transcription  
535 factor in *Aspergillus niger* reveals a coordinated cellular response to counteract ER stress. *BMC*  
536 *Genomics* 13, 2–17. doi:10.1186/1471-2164-13-350.
- 537 Cerqueira, G. C., Arnaud, M. B., Inglis, D. O., Skrzypek, M. S., Binkley, G., Simison, M., et al. (2014). The  
538 *Aspergillus* Genome Database: Multispecies curation and incorporation of RNA-Seq data to improve  
539 structural gene annotations. *Nucleic Acids Res.* 42, D705–D710. doi:10.1093/nar/gkt1029.
- 540 Chang, H. C., Nathan, D. F., and Lindquist, S. (1997). In vivo analysis of the Hsp90 cochaperone Sti1 (p60).  
541 *Mol. Cell. Biol.* 17, 318–325. doi:10.1128/MCB.17.1.318.
- 542 Clutterbuck, A. J. (1992). Sexual and parasexual genetics of *Aspergillus* species. *Biotechnology* 23, 3–18.  
543 Available at: <http://www.ncbi.nlm.nih.gov/pubmed/1504604> [Accessed April 24, 2016].
- 544 Floer, M., Bryant, G. O., and Ptashne, M. (2008). HSP90/70 chaperones are required for rapid nucleosome  
545 removal upon induction of the GAL genes of yeast. *Proc. Natl. Acad. Sci.* 105, 2975–2980.  
546 doi:10.1073/pnas.0800053105.
- 547 Guillemette, T., Ram, A. F. J., Carvalho, N. D. S. P., Joubert, A., Simoneau, P., and Archer, D. B. (2011).  
548 Methods for investigating the UPR in filamentous fungi. *Methods Enzymol.* 490, 1–29.  
549 doi:10.1016/B978-0-12-385114-7.00001-5.
- 550 Guillemette, T., van Peij, N. N. M. E., Goosen, T., Lanthaler, K., Robson, G. D., van den Hondel, C. a M. J.  
551 J., et al. (2007). Genomic analysis of the secretion stress response in the enzyme-producing cell factory  
552 *Aspergillus niger*. *BMC Genomics* 8, 158. doi:10.1186/1471-2164-8-158.
- 553 Han, S., Lone, M. A., Schneider, R., and Chang, A. (2010). Orm1 and Orm2 are conserved endoplasmic  
554 reticulum membrane proteins regulating lipid homeostasis and protein quality control. *Proc. Natl. Acad.*  
555 *Sci.* 107, 5851–5856. doi:10.1073/pnas.0911617107.
- 556 Harmsen, M. M., Bruyne, M. I., Raué, H. A., and Maat, J. (1996). Overexpression of binding protein and  
557 disruption of the PMR1 gene synergistically stimulate secretion of bovine prochymosin but not plant  
558 Thaumatin in yeast. *Appl. Microbiol. Biotechnol.* 46, 365–370. doi:10.1007/s002530050831.
- 559 Hayano, T., Hirose, M., and Kikuchi, M. (1995). Protein disulfide isomerase mutant lacking its isomerase  
560 activity accelerates protein folding in the cell. *FEBS Lett.* 377, 505–511. doi:10.1016/0014-

- 561 5793(95)01410-1.
- 562 Heimel, K. (2014). Unfolded protein response in filamentous fungi—implications in biotechnology. *Appl.*  
563 *Microbiol. Biotechnol.* 99, 121–132. doi:10.1007/s00253-014-6192-7.
- 564 Kim, D., Pertea, G., Trapnell, C., Pimentel, H., Kelley, R., and Salzberg, S. L. (2013). TopHat2: accurate  
565 alignment of transcriptomes in the presence of insertions, deletions and gene fusions. *Genome Biol.* 14,  
566 R36. doi:10.1186/gb-2013-14-4-r36.
- 567 Kopylova, E., Noé, L., and Touzet, H. (2012). SortMeRNA: Fast and accurate filtering of ribosomal RNAs in  
568 metatranscriptomic data. *Bioinformatics* 28, 3211–3217. doi:10.1093/bioinformatics/bts611.
- 569 Kriangkripipat, T., and Momany, M. (2009). *Aspergillus nidulans* protein O-mannosyltransferases play roles  
570 in cell wall integrity and developmental patterning. *Eukaryot. Cell* 8, 1475–1485. doi:10.1128/EC.00040-  
571 09.
- 572 Kwon, M. J., Jørgensen, T. R., Nitsche, B. M., Arentshorst, M., Park, J., Ram, A. F., et al. (2012). The  
573 transcriptomic fingerprint of glucoamylase over-expression in *Aspergillus niger*. *BMC Genomics* 13,  
574 701. doi:10.1186/1471-2164-13-701.
- 575 Langfelder, P., and Horvath, S. (2008). WGCNA: An R package for weighted correlation network analysis.  
576 *BMC Bioinformatics* 9. doi:10.1186/1471-2105-9-559.
- 577 Liu, L., Feizi, A., Österlund, T., Hjort, C., and Nielsen, J. (2014). Genome-scale analysis of the high-efficient  
578 protein secretion system of *Aspergillus oryzae*. *BMC Syst. Biol.* 8, 73. doi:10.1186/1752-0509-8-73.
- 579 Livak, K. J., and Schmittgen, T. D. (2001). Analysis of Relative Gene Expression Data Using Real-Time  
580 Quantitative PCR and the 2<sup>-</sup> $\Delta\Delta$ CT Method. *Methods* 25, 402–408. doi:10.1006/meth.2001.1262.
- 581 Llanos, A., François, J. M., and Parrou, J.-L. (2015). Tracking the best reference genes for RT-qPCR data  
582 normalization in filamentous fungi. *BMC Genomics* 16, 71. doi:10.1186/s12864-015-1224-y.
- 583 Love, M. I., Huber, W., and Anders, S. (2014). Moderated estimation of fold change and dispersion for RNA-  
584 seq data with DESeq2. Cold Spring Harbor Labs Journals doi:10.1186/s13059-014-0550-8.
- 585 Lowe, R. G. T., and Howlett, B. J. (2012). Indifferent, affectionate, or deceitful: Lifestyles and secretomes of  
586 fungi. *PLoS Pathog.* 8, 1–3. doi:10.1371/journal.ppat.1002515.
- 587 Lubertozzi, D., and Keasling, J. D. (2009). Developing *Aspergillus* as a host for heterologous expression.  
588 *Biotechnol. Adv.* 27, 53–75. doi:10.1016/j.biotechadv.2008.09.001.
- 589 Maere, S., Heymans, K., and Kuiper, M. (2005). BiNGO: A Cytoscape plugin to assess overrepresentation of  
590 Gene Ontology categories in Biological Networks. *Bioinformatics* 21, 3448–3449.  
591 doi:10.1093/bioinformatics/bti551.
- 592 Matsumoto, R., Akama, K., Rakwal, R., and Iwahashi, H. (2005). The stress response against denatured  
593 proteins in the deletion of cytosolic chaperones SSA1/2 is different from heat-shock response in  
594 *Saccharomyces cerevisiae*. *BMC Genomics* 6, 1–15. doi:10.1186/1471-2164-6-141.
- 595 Meyer, V., Andersen, M. R., Brakhage, A. A., Braus, G. H., Caddick, M. X., Cairns, T. C., et al. (2016).  
596 Current challenges of research on filamentous fungi in relation to human welfare and a sustainable bio-  
597 economy: a white paper. *Fungal Biol. Biotechnol.* 3, 6. doi:10.1186/s40694-016-0024-8.
- 598 Miller, G. L. (1959). Use of Dinitrosalicylic Acid Reagent for Determination of Reducing Sugar. *Anal. Chem.*

- 599 31, 426–428. doi:10.1021/ac60147a030.
- 600 Nevalainen, H., and Peterson, R. (2014). Making recombinant proteins in filamentous fungi- Are we expecting  
601 too much? *Front. Microbiol.* 5, 75. doi:10.3389/fmicb.2014.00075.
- 602 Pakula, T. M., Laxell, M., Huuskonen, A., Uusitalo, J., Saloheimo, M., and Penttilä, M. (2003). The Effects of  
603 Drugs Inhibiting Protein Secretion in the Filamentous Fungus *Trichoderma reesei*. *J. Biol. Chem.* 278,  
604 45011–45020. doi:10.1074/jbc.M302372200.
- 605 Pakula, T. M., Nygren, H., Barth, D., Heinonen, M., Castillo, S., Penttilä, M., et al. (2016). Genome wide  
606 analysis of protein production load in *Trichoderma reesei*. *Biotechnol. Biofuels* 9, 132.  
607 doi:10.1186/s13068-016-0547-5.
- 608 Pontecorvo, G., Roper, J. A., Chemmons, L. M., Macdonald, K. D., and Bufton, A. W. J. (1953). “The Genetics  
609 of *Aspergillus nidulans*,” in *Advances in Genetics*, 141–238. doi:10.1016/S0065-2660(08)60408-3.
- 610 Reseach, B. (2014). Global Markets for Enzymes in Industrial Applications. *Focus Catal.* 1, 2.  
611 doi:10.1016/S1351-4180(14)70133-3.
- 612 Ruepp, A. (2004). The FunCat, a functional annotation scheme for systematic classification of proteins from  
613 whole genomes. *Nucleic Acids Res.* 32, 5539–5545. doi:10.1093/nar/gkh894.
- 614 Schalén, M., Anyaogu, D. C., Hoof, J. B., and Workman, M. (2016). Effect of secretory pathway gene  
615 overexpression on secretion of a fluorescent reporter protein in *Aspergillus nidulans*. *Fungal Biol.*  
616 *Biotechnol.* 3, 3. doi:10.1186/s40694-016-0021-y.
- 617 Segato, F., Damásio, A. R. L., Gonçalves, T. A., de Lucas, R. C., Squina, F. M., Decker, S. R., et al. (2012).  
618 High-yield secretion of multiple client proteins in *Aspergillus*. *Enzyme Microb. Technol.* 51, 100–106.  
619 doi:10.1016/j.enzmictec.2012.04.008.
- 620 Shapiro, a L., and Maizel, J. V (1969). Molecular weight estimation of polypeptides by SDS-polyacrylamide  
621 gel electrophoresis: further data concerning resolving power and general considerations. *Anal. Biochem.*  
622 29, 505–514. doi:10.1016/0003-2697(69)90335-2.
- 623 Sims, A. H., Gent, M. E., Lanthaler, K., Dunn-Coleman, N. S., Oliver, S. G., and Robson, G. D. (2005).  
624 Transcriptome analysis of recombinant protein secretion by *Aspergillus nidulans* and the unfolded-  
625 protein response in vivo. *Appl. Environ. Microbiol.* 71, 2737–2747. doi:10.1128/AEM.71.5.2737-  
626 2747.2005.
- 627 Travers, K. J., Patil, C. K., Wodicka, L., Lockhart, D. J., Weissman, J. S., and Walter, P. (2000). Functional  
628 and genomic analyses reveal an essential coordination between the unfolded protein response and ER-  
629 associated degradation. *Cell* 101, 249–258. doi:10.1016/S0092-8674(00)80835-1.
- 630 Valkonen, M., Penttilä, M., and Saloheimo, M. (2003). Effects of inactivation and constitutive expression of  
631 the unfolded- protein response pathway on protein production in the yeast *Saccharomyces cerevisiae*.  
632 *Appl. Environ. Microbiol.* 69, 2065–72. doi:10.1128/AEM.69.4.2065.
- 633 Valkonen, M., Penttilä, M., and Saloheimo, M. (2004). The *ire1* and *ptc2* genes involved in the unfolded  
634 protein response pathway in the filamentous fungus *Trichoderma reesei*. *Mol. Genet. Genomics* 272, 443–  
635 51. doi:10.1007/s00438-004-1070-0.
- 636 Wang, G., Zhang, D., and Chen, S. (2014). Effect of earlier unfolded protein response and efficient protein

- 637 disposal system on cellulase production in Rut C30. *World J. Microbiol. Biotechnol.* 30, 2587–2595.  
638 doi:10.1007/s11274-014-1682-4.
- 639 Wood, V., Harris, M. A., McDowall, M. D., Rutherford, K., Vaughan, B. W., Staines, D. M., et al. (2012).  
640 PomBase: A comprehensive online resource for fission yeast. *Nucleic Acids Res.* 40, D695–D699.  
641 doi:10.1093/nar/gkr853.
- 642 Xu, P., Raden, D., Doyle, F. J., and Robinson, A. S. (2005). Analysis of unfolded protein response during  
643 single-chain antibody expression in *Saccharomyces cerevisiae* reveals different roles for BiP and PDI in  
644 folding. *Metab. Eng.* 7, 269–279. doi:10.1016/j.ymben.2005.04.002.
- 645 Yoon, J., Aishan, T., Maruyama, J. I., and Kitamoto, K. (2010). Enhanced production and secretion of  
646 heterologous proteins by the filamentous fungus *Aspergillus oryzae* via disruption of vacuolar protein  
647 sorting receptor gene *AoVps10*. *Appl. Environ. Microbiol.* 76, 5718–5727. doi:10.1128/AEM.03087-09.
- 648 Yoon, J., Maruyama, J., and Kitamoto, K. (2011). Disruption of ten protease genes in the filamentous fungus  
649 *Aspergillus oryzae* highly improves production of heterologous proteins. *Appl. Microbiol. Biotechnol.*  
650 89, 747–59. doi:10.1007/s00253-010-2937-0.
- 651 Zhang, J., Pan, J., Guan, G., Li, Y., Xue, W., Tang, G., et al. (2008). Expression and high-yield production of  
652 extremely thermostable bacterial xylanase B in *Aspergillus niger*. *Enzyme Microb. Technol.* 43, 513–  
653 516. doi:10.1016/j.enzmictec.2008.07.010.
- 654 Zhou, B., Xie, J., Liu, X., Wang, B., and Pan, L. (2016). Functional and transcriptomic analysis of the key  
655 unfolded protein response transcription factor HacA in *Aspergillus oryzae*. *Gene* 593, 143–153.  
656 doi:10.1016/j.gene.2016.08.018.
- 657 Zoglowek, M., Lübeck, P. S., Ahring, B. K., and Lübeck, M. (2015). Heterologous expression of  
658 cellobiohydrolases in filamentous fungi - An update on the current challenges, achievements and  
659 perspectives. *Process Biochem.* 50, 211–220. doi:10.1016/j.procbio.2014.12.018.
- 660 Zuehlke, A. D., and Johnson, J. L. (2012). Chaperoning the chaperone: A role for the co-chaperone Cpr7 in  
661 modulating Hsp90 function in *Saccharomyces cerevisiae*. *Genetics* 191, 805–814.  
662 doi:10.1534/genetics.112.140319.
- 663  
664  
665

666 **FIGURE CAPTIONS**

667 **Figure 1. Physiological parameters and heterologous protein production by *A. nidulans***  
668 **recombinant strains.** A) *A. nidulans*<sub>AbfA</sub>, B) *A. nidulans*<sub>BglC</sub>, C) *A. nidulans*<sub>Tp-Man5</sub>. Physiological  
669 parameters (top): mycelium dry weight (g), final pH and extracellular proteins (mg/mL). Enzymatic  
670 activity of the *A. nidulans* strains during different cultivation periods (center). The highest enzymatic  
671 activity in each culture was considered to be 100%. SDS-PAGE of the heterologous proteins secreted  
672 by the recombinant *A. nidulans* strains during different cultivation periods (bottom). Ten micrograms  
673 of protein was applied in each lane. The target proteins are indicated by an asterisk. The red box  
674 indicates a native intracellular beta-glucosidase detected after 48 h of cultivation. The band  
675 corresponding to the Tp-Man5 protein was not detected by SDS-PAGE (bottom at right). Error  
676 bars indicate the standard deviation of three replicates.

677  
678 **Figure 2. Gene expression profiles of *A. nidulans* recombinant strains.** Expression levels were  
679 determined by qRT-PCR for different cultivation periods and expressed on a logarithmic scale as fold  
680 changes. A) Gene expression profile of the heterologous genes *abfA*, *bglC* and *tp-man5*. B)  
681 Expression of *bipA*, *cpcA* and *sell* in *A. nidulans*<sub>AbfA</sub>, *A. nidulans*<sub>BglC</sub> and *A. nidulans*<sub>Tp-Man5</sub>. *tubC*  
682 was used as the reference gene, and the strain *A. nidulans*<sub>A773</sub> was the experimental control. The  $\Delta\Delta Ct$   
683 method was used to calculate gene expression. Asterisks indicate significantly different results (two-  
684 way ANOVA and Bonferroni posttest p-value<0.05). The strains were cultivated as described in the  
685 Materials and Methods section. The results are expressed as the mean values of three biological  
686 replicates and the error bars indicate standard deviation.

687  
688 **Figure 3. Global analysis of DE genes.** A) Bar chart representing DE genes in the *A. nidulans*  
689 recombinant strains. Rectangles above the bars indicate the number of up- and downregulated genes.  
690 RNA-seq data for each recombinant strain were compared to that of the control strain *A. nidulans*<sub>A773</sub>,  
691 and a log 2 fold change  $\leq -2.0$  or  $\geq 2.0$  and adjusted p-value  $\leq 0.01$  were used as thresholds. B) Venn  
692 diagram representing DE genes analyzed by RNA-seq at 2 and 8 h of cultivation for the three *A.*  
693 *nidulans* recombinant strains. The Venn diagram was created using the online tool Venny 2.1.

694  
695 **Figure 4. Functional annotation of the transcriptomic data for *A. nidulans* recombinant strains.**  
696 MIPS FunCat term annotations of *A. nidulans*<sub>Tp-Man5</sub>, *A. nidulans*<sub>AbfA</sub> and *A. nidulans*<sub>BglC</sub> shows a  
697 broad variety of biological processes associated with DE genes of the *A. nidulans* recombinant strains.  
698 Analysis of the functional categories from global transcriptomic data was performed with FunCat.  
699 Functional categories in the heatmap represent the number of DE genes found in the transcriptomic

700 data based on reference genome annotation. The heat map was created with online software from the  
701 Broad Institute, Morpheus.

702

703 **Figure 5. DE genes common to all recombinant strains.** (A) Hierarchical clustering fell into three  
704 major clusters. (B) A schematic representation of each pattern of transcriptional change: up (increased  
705 at 2 and 8 h), down to up (decreased at 2 h and increased at 8 h), and up to down (increased at 2 h and  
706 decreased at 8 h). Circles: 10 genes; squares: 8 genes; triangles: 12 genes. Gray symbols: 2 h. Black  
707 symbols: 8 h.

708

709 **Figure 6. Analysis of genes with predicted functions in the secretory pathway.** A) Heatmap  
710 representing the 17 DE genes with predicted functions in the in the secretion pathway in *A. nidulans*.  
711 B) Venn Diagram. No gene was common to all recombinant strains. The Venn diagram was created  
712 using the online tool Venny 2.1. C) Functional annotations of DE genes. The analysis of functional  
713 categories was performed with FunCat. The values represent the number of altered genes found (abs  
714 set) in the transcriptomic data based on the values of the reference genome annotation. All functional  
715 subcategories with at least five DE genes are represented. *A. nidulans* strains were cultivated as  
716 described in the Materials and Methods section. Heatmaps were created with online software from  
717 Broad Institute, Morpheus.

718

719 **Figure 7. RNA-seq network.** DE genes in which “protein folding” was observed as an enriched  
720 biological process. Yellow circles represent DE genes (AN9124, AN4583, AN5129 and AN8269)  
721 with predicted functions in the secretion pathway and their first interactions. Genes of interest are  
722 found within blue circles.

723

Figure 1

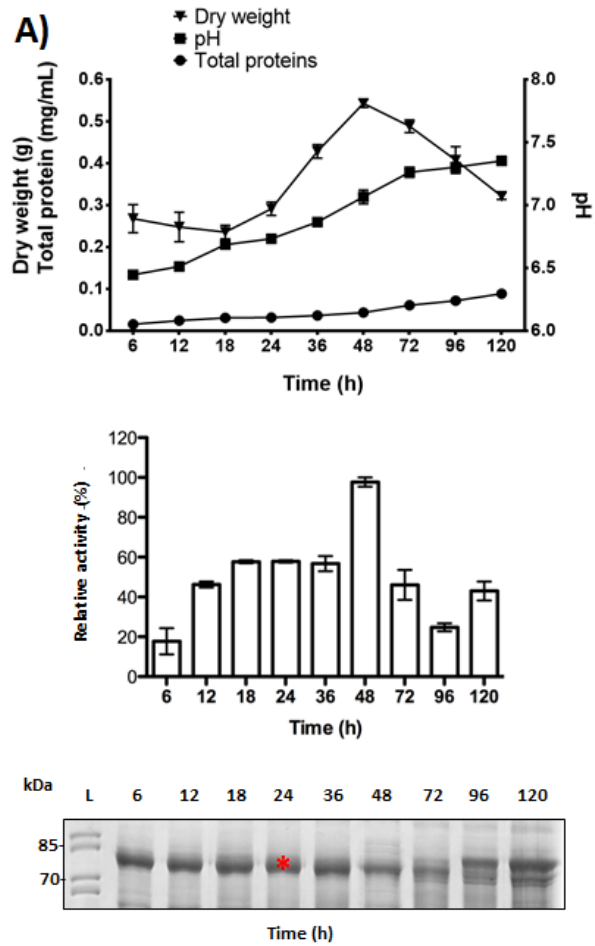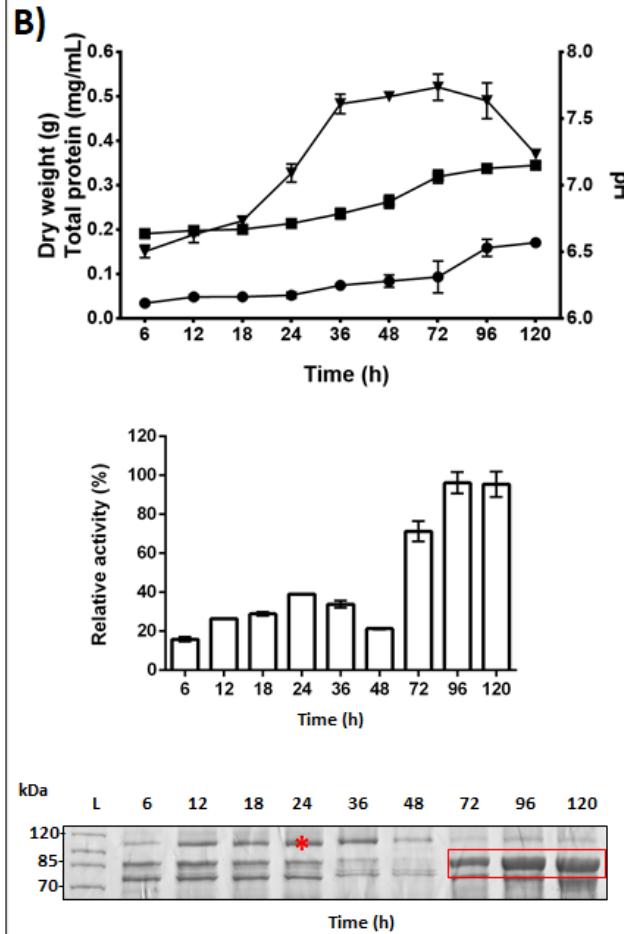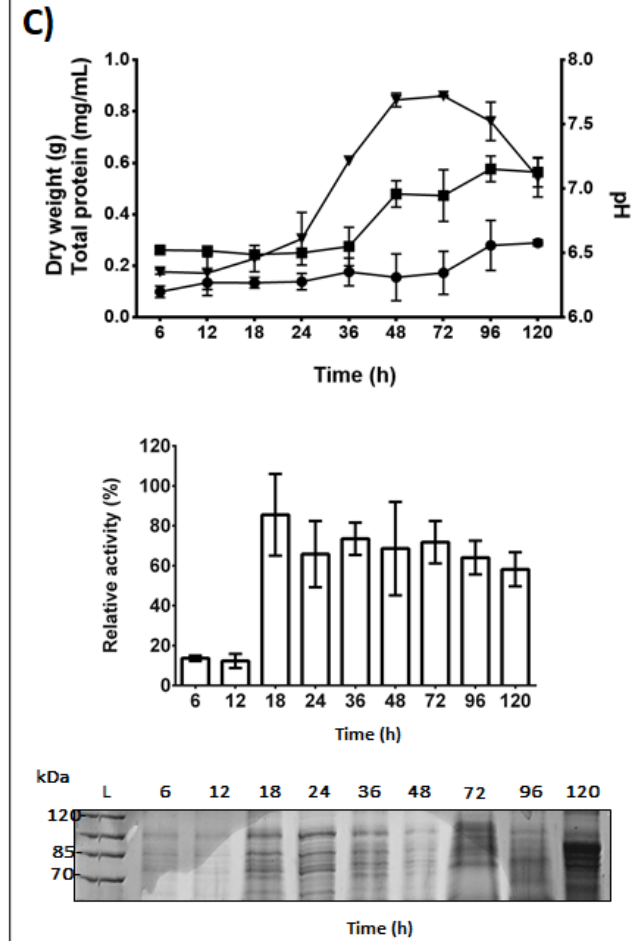

Figure 2

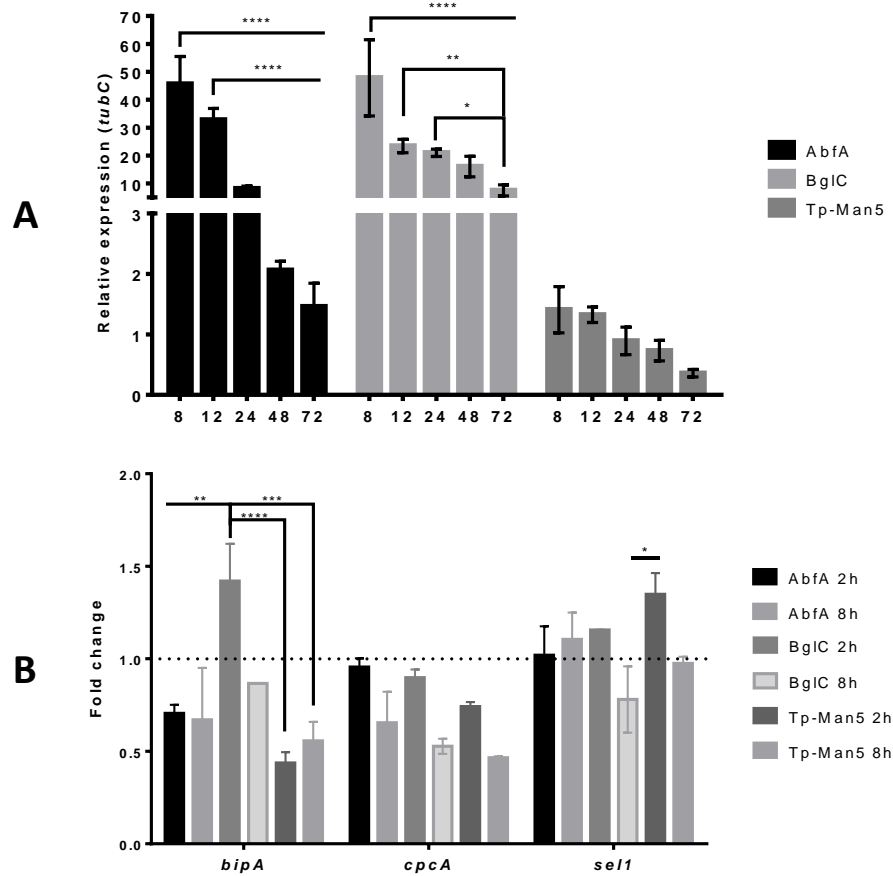



Figure 3

A

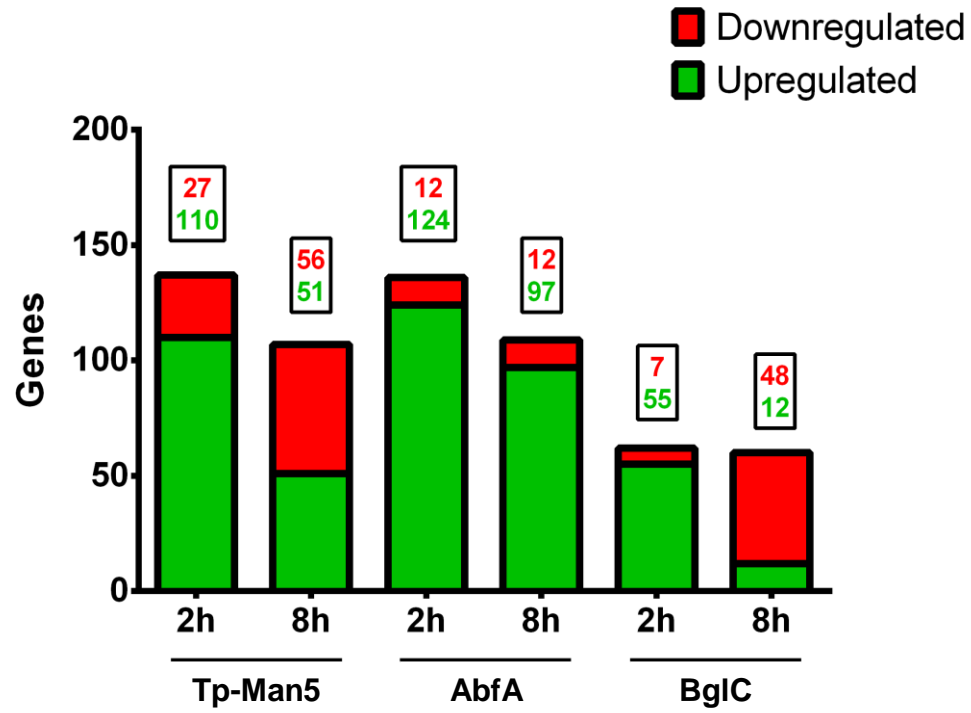

B

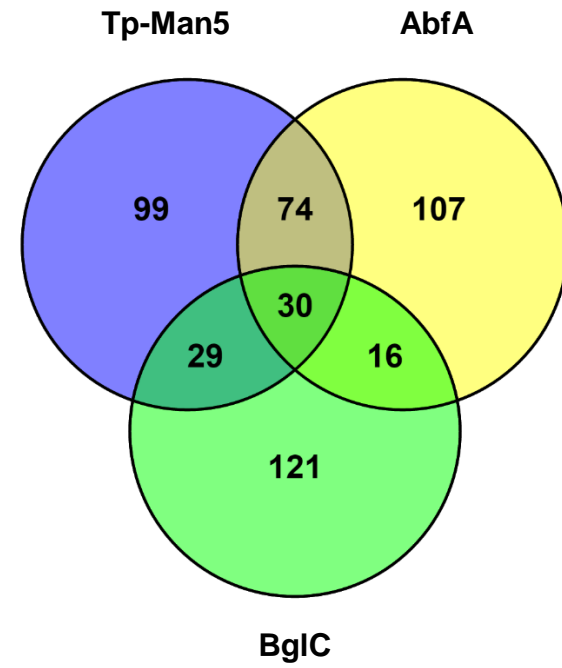

**Figure 4**

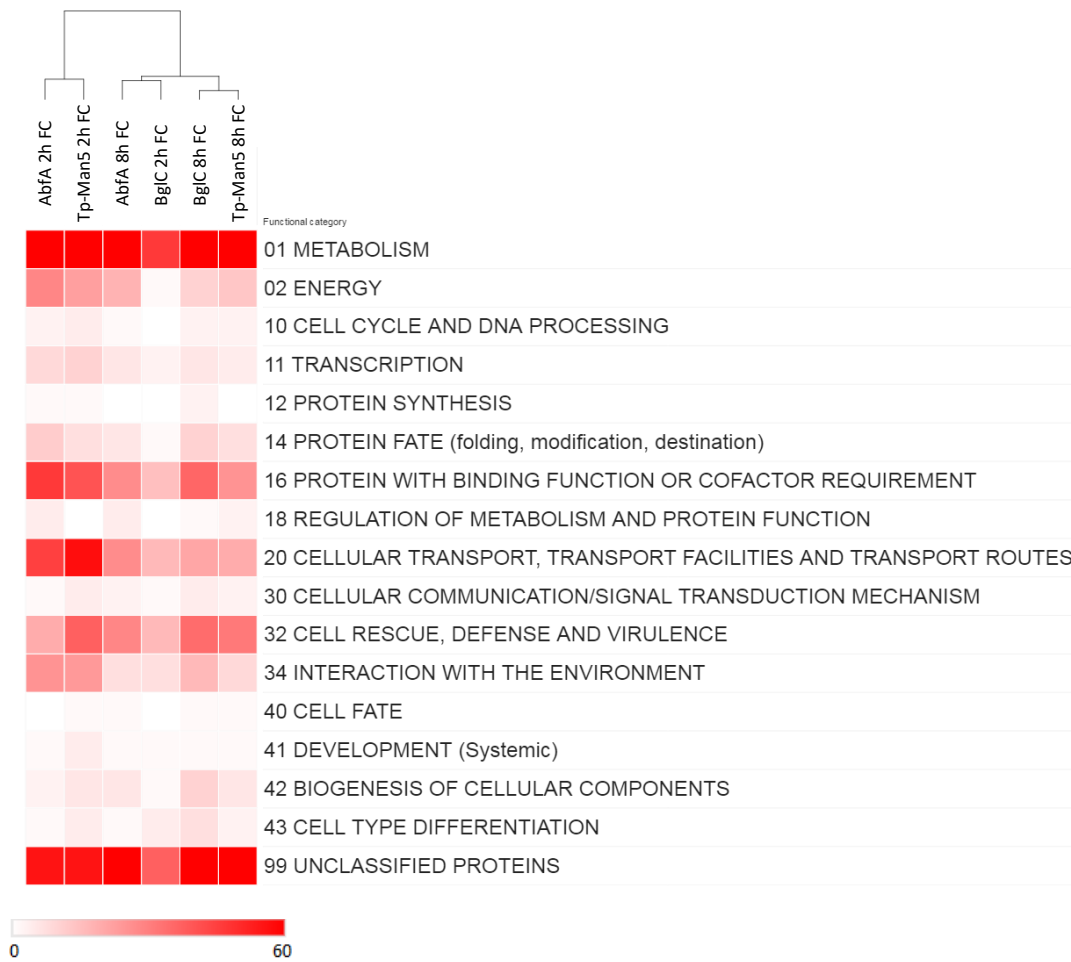

Figure 5

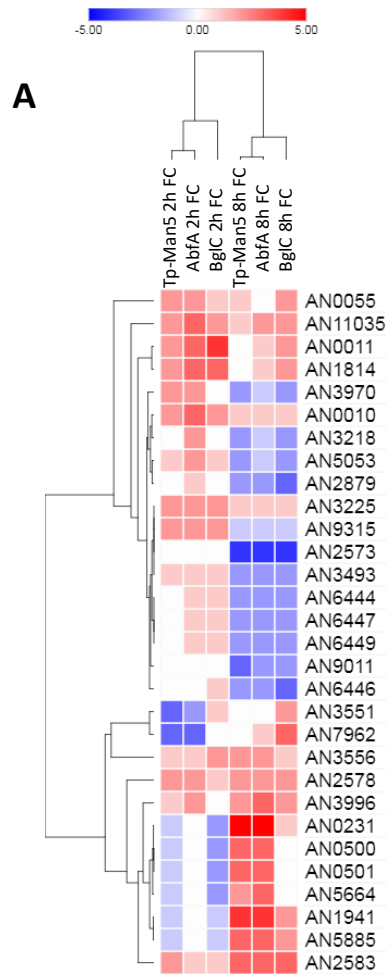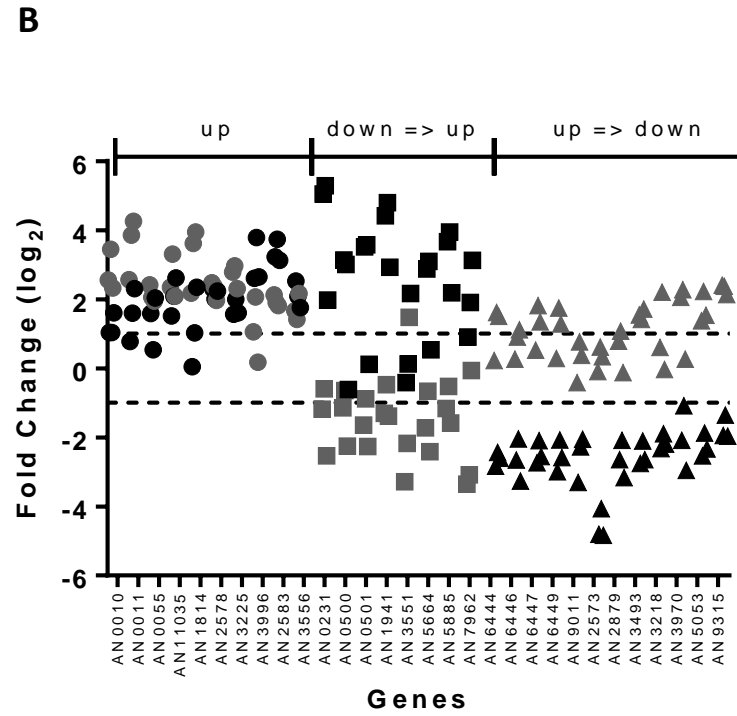

**Figure 6**

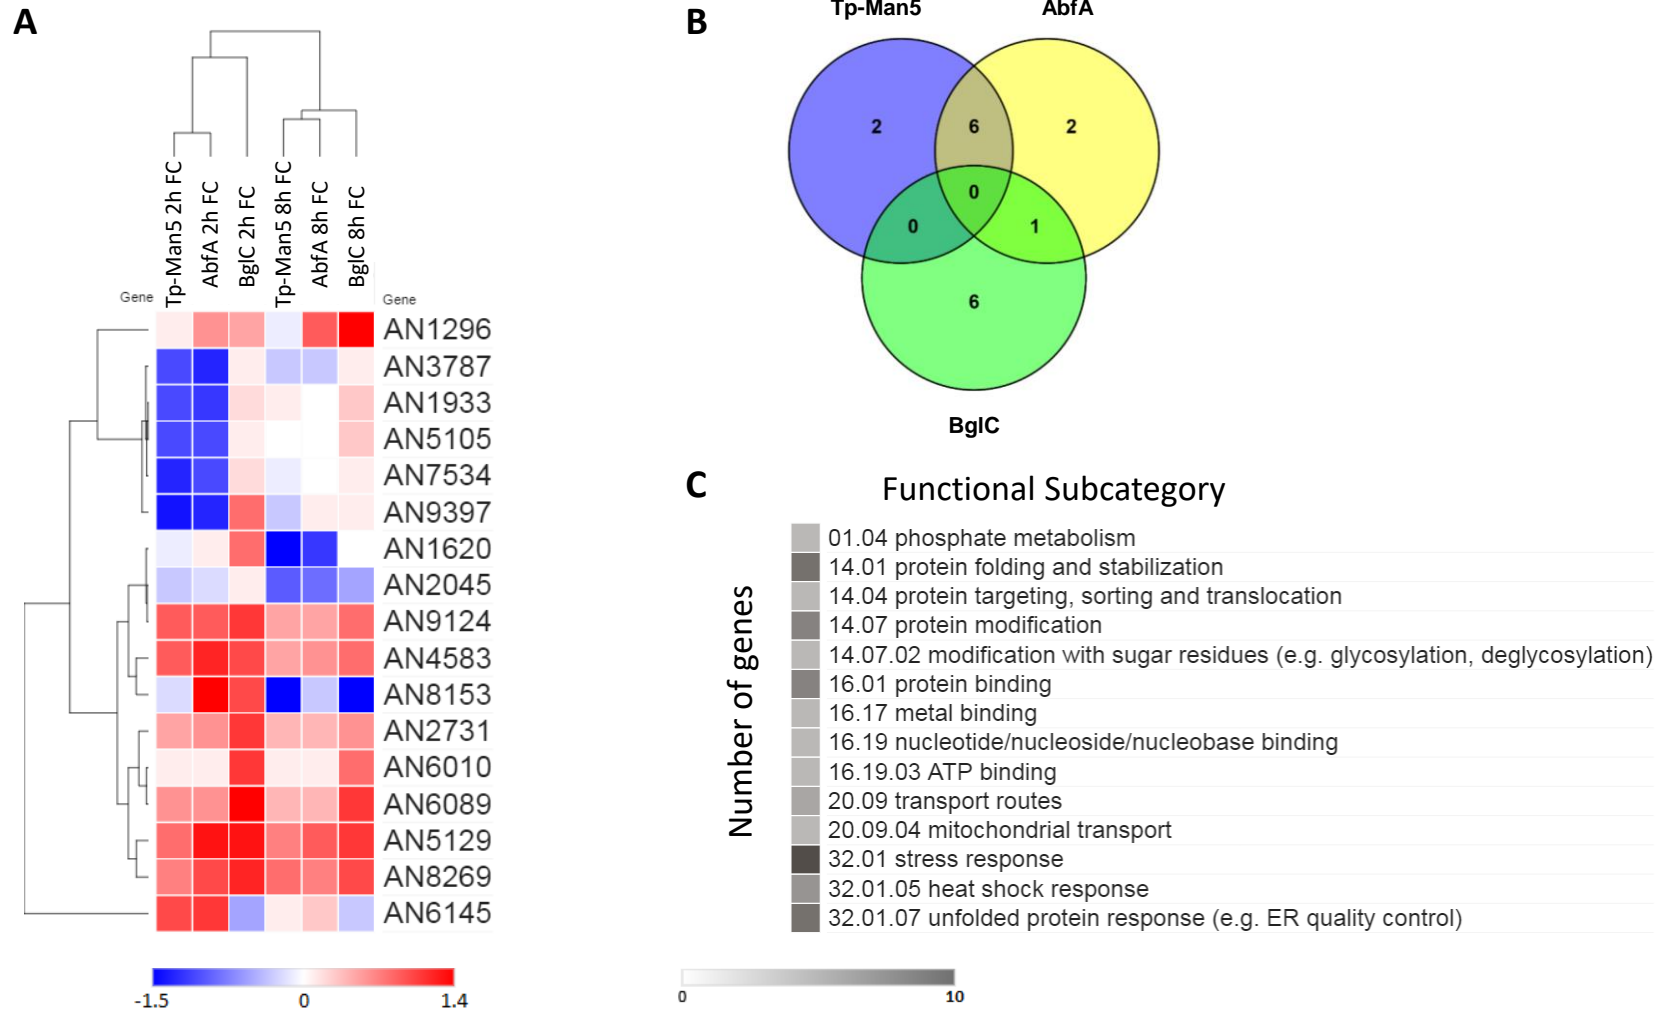

**Figure 7**

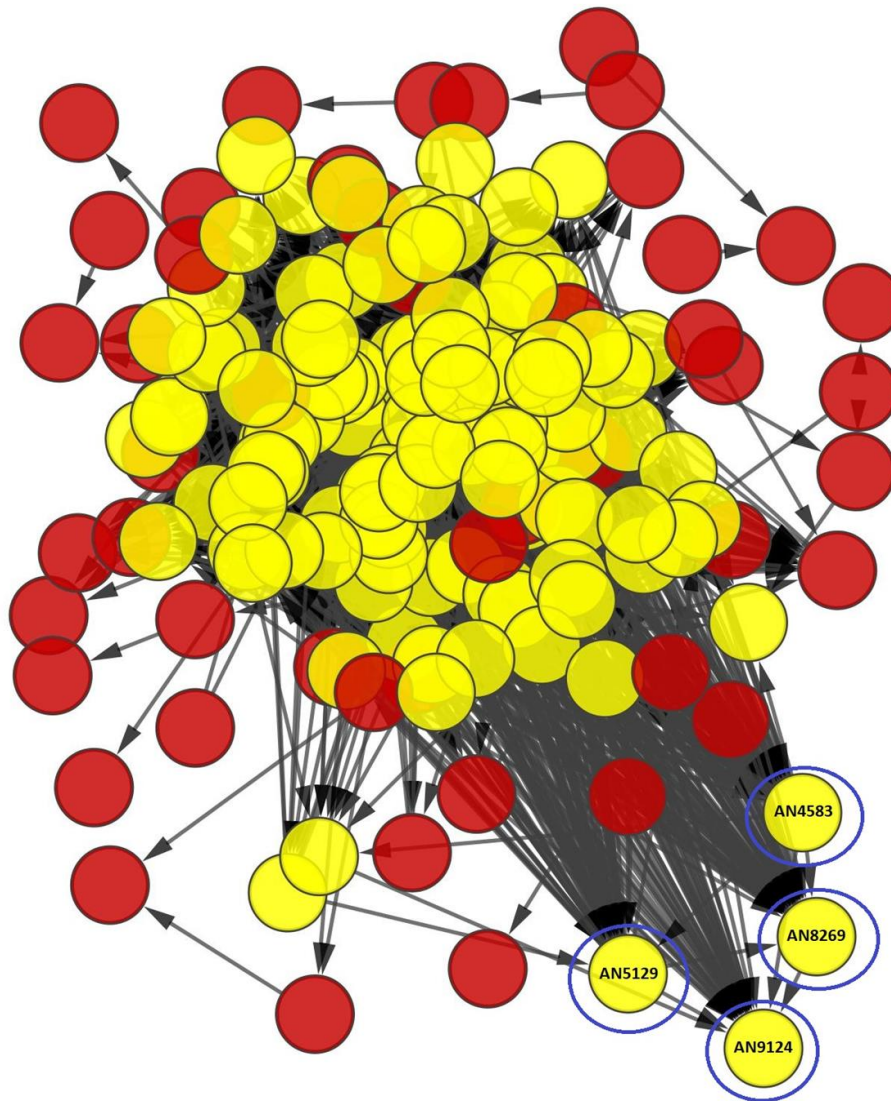

Source: https://www.biorxiv.org/content/10.1101/241273v3.full.pdf
